# Supplementary material for: Comparative study of solvothermal and catalytic solvothermal carbonization of rice husk for Fe(iii), Zn(ii), Cu(ii), Pb(ii) and Mn(ii) adsorption, kinetics, surface chemistry and reaction mechanism
Source: Royal Society of Chemistry journal article supplement (doi:10.1039/d3ew00068k), 2023-01-01
Supplement: d3ew00068k1.pdf [file d3ew00068k1.pdf]

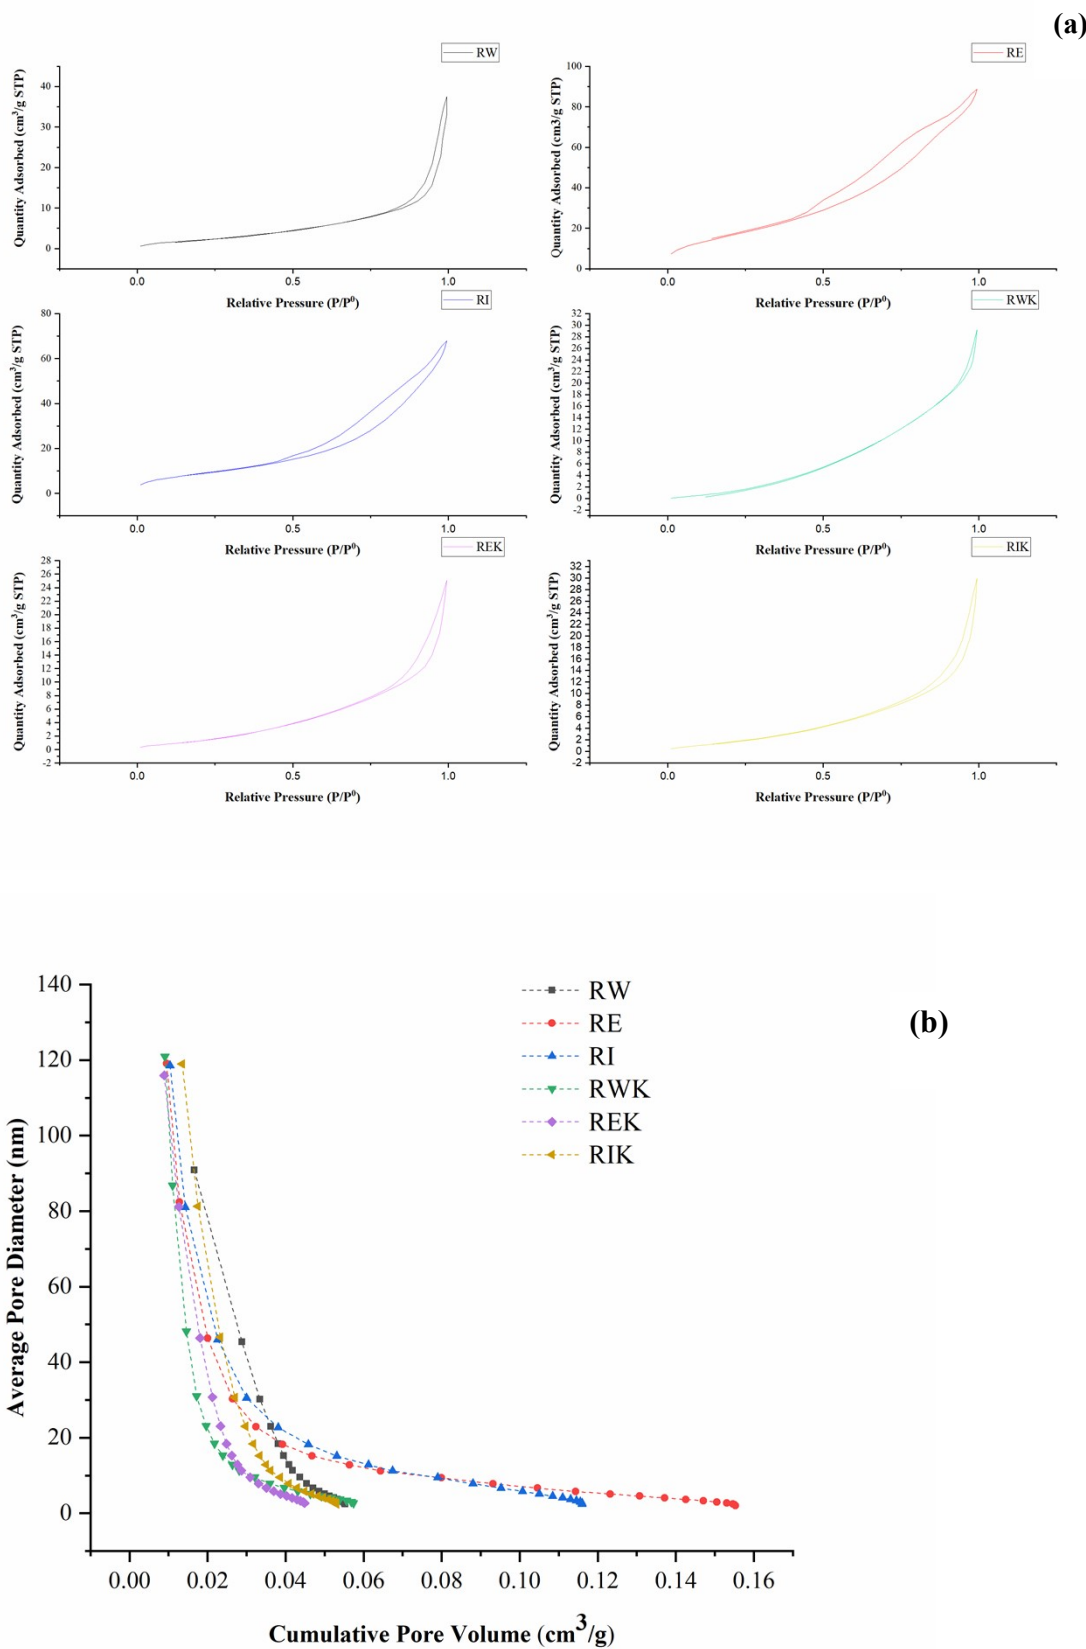

**Fig. S1.:**  $N_2$  adsorption-desorption isotherms (a), pore distribution (b) of solvochars/catalytic solvochars

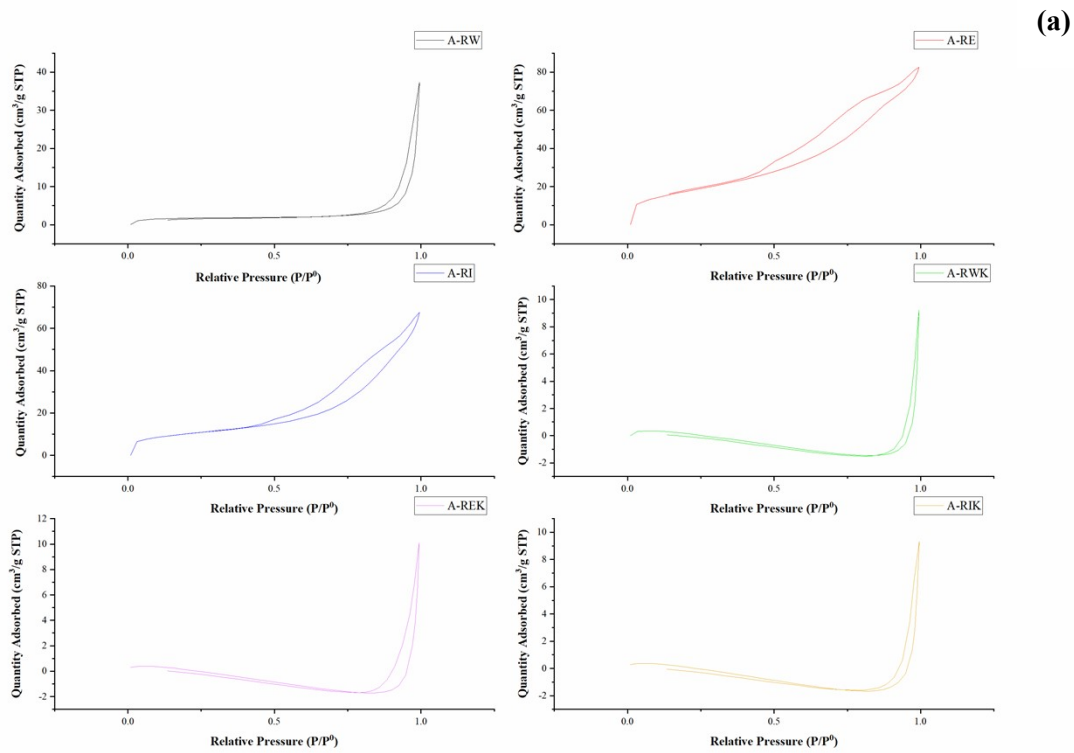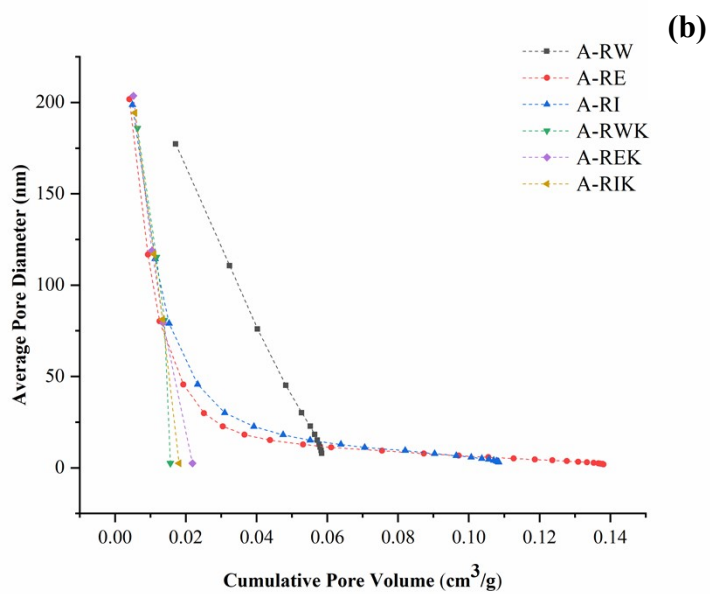

**Fig. S2:**  $N_2$  adsorption-desorption isotherms (a), pore distribution (b) at post-adsorption (after 1<sup>st</sup> run) stage

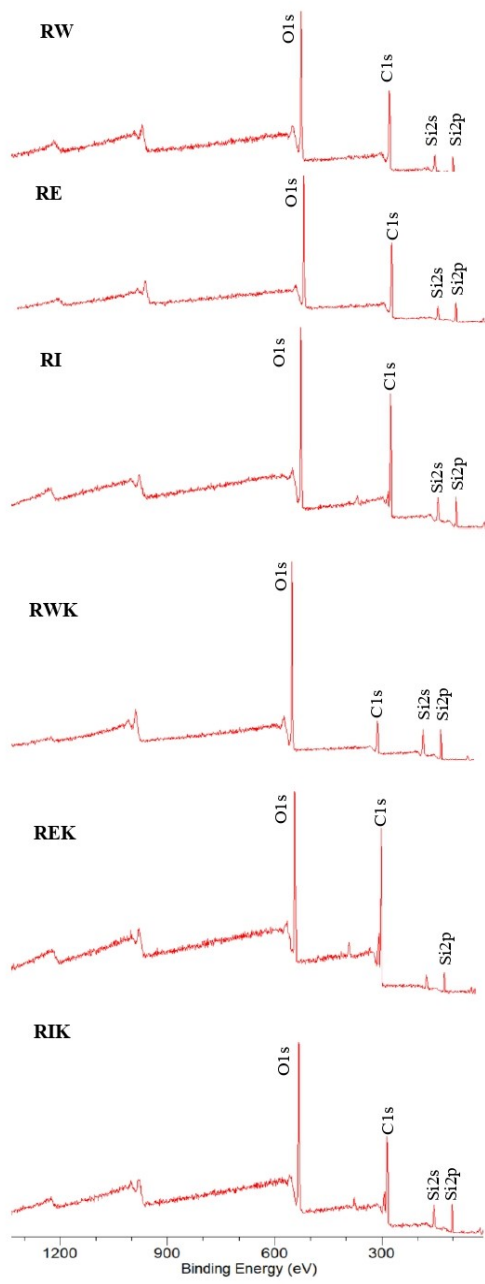

**Fig. S3:** XPS spectra of solvochars/catalytic solvochars

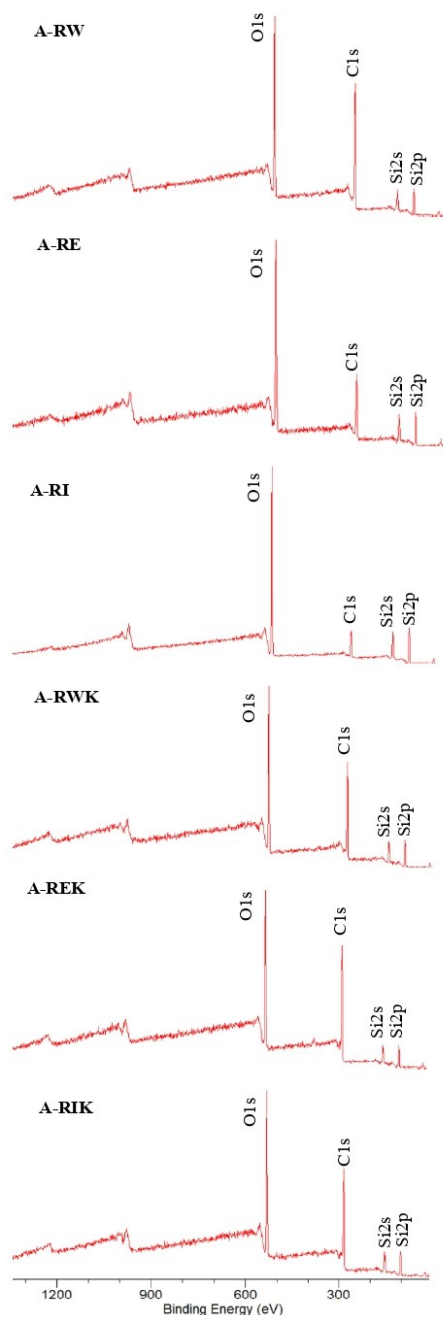

**Fig. S4:** XPS spectra of solvochars/catalytic solvochars at post-adsorption stage (after 1<sup>st</sup> run)

**Table S1:** FTIR analysis of the solvochars/catalytic solvochars

| Wavenumber range (cm <sup>-1</sup> ) |                       | Bond type                  | Functional groups                                                    | Remarks                                                                                                                                                                                                                    |
|--------------------------------------|-----------------------|----------------------------|----------------------------------------------------------------------|----------------------------------------------------------------------------------------------------------------------------------------------------------------------------------------------------------------------------|
| $\lambda_{\text{exp}}$               | $\lambda_{\text{th}}$ |                            |                                                                      |                                                                                                                                                                                                                            |
| 794-840                              | 740-840               | C-C                        | Aromatic mono-substituted                                            | Presence of aromatic C and lignin content                                                                                                                                                                                  |
| 1070-1179                            | 1050-1080             | C-O                        | Primary alcohol                                                      | -Presence of organic compounds, oxygen-containing groups enhance heavy metal ion adsorption<br>- Presence of organic compound suitable for soil remediations<br>-Presence of inorganic compounds such as silica and others |
|                                      | 1085-1185             | C-O                        | Secondary alcohol                                                    |                                                                                                                                                                                                                            |
|                                      | 1000-1300             | C-O-C, C-OH, S=O, P=O, C-F | Ethers, alcohols, sugars, sulfur, phosphorus, and fluorine compounds |                                                                                                                                                                                                                            |
|                                      | 1080-1100             | Si-O-Si                    | Silica compounds                                                     |                                                                                                                                                                                                                            |
| 1415                                 | 1400-1450             | C=O                        | Carbonyl groups                                                      | -Dehydration of cellulose and                                                                                                                                                                                              |
| 1545-1645                            | 1545-1650             | N-H                        | Amine primary                                                        | Nitrogen fixation for wastewater treatment and soil remediation                                                                                                                                                            |
| 1704                                 | 1630-1725             | -NH <sub>2</sub><br>C=O    | Amide and Aromatic ketones                                           | Presence of carbonyl groups                                                                                                                                                                                                |
| 2934-2937                            | 2840-3000             | C-H                        | Alkanes                                                              | Presence of aromatic carbon                                                                                                                                                                                                |

**Table S2:** Average of relative concentrations and standard deviation of the mean for each of the three chemical states and binding energy by XPS analysis

| Chemical state | Binding energy C1s (eV) | Functional groups                     | Remarks                                                                    |
|----------------|-------------------------|---------------------------------------|----------------------------------------------------------------------------|
| C-C            | ~284.8                  | Aliphatic and aromatic carbon bonding | Adventitious carbon, lignin and extractives                                |
| C-O-C          | ~286                    | Carbon atom from ketone group         | Cellulose and hemicellulose                                                |
| O-C=O          | ~288.5                  | Carbon atom from a carboxylic group   | High content of aliphatic carbon with carboxylic acids as functional group |
